# Supplementary material for: Mir34a constrains pancreatic carcinogenesis
Source: PubMed Central journal article supplement (PMC7295749; doi:10.1038/s41598-020-66561-1), 2020-06-15
Supplement: 41598_2020_66561_MOESM1_ESM.pdf [file 41598_2020_66561_MOESM1_ESM.pdf]

## ***Mir34a* constrains pancreatic carcinogenesis**

Ana Hidalgo-Sastre<sup>1</sup>, Clara Lubeseder-Martellato<sup>1</sup>, Thomas Engleitner<sup>2</sup>, Katja Steiger<sup>3</sup>, Suyang Zhong<sup>1</sup>, Judit Desztics<sup>1</sup>, Rupert Öllinger<sup>2</sup>, Roland Rad<sup>2</sup>, Roland M. Schmid<sup>1</sup>, Heiko Hermeking<sup>4,5</sup>, Jens T. Siveke<sup>6,7,8</sup>, and Guido von Figura<sup>1\*</sup>.

<sup>1</sup> Klinik und Poliklinik für Innere Medizin II, Technical University of Munich, Germany.

<sup>2</sup> Institute of Molecular Oncology and Functional Genomics, Department of Medicine II and TranslaTUM Cancer Center, Klinikum rechts der Isar, Technical University of Munich, Munich, Germany.

<sup>3</sup> Institute of Pathology, Technical University of Munich, Germany.

<sup>4</sup> Experimental and Molecular Pathology, Institute of Pathology, Ludwig Maximilian University Munich, Munich, Germany.

<sup>5</sup> German Cancer Consortium (DKTK), Partner site Munich, Germany

<sup>6</sup> Institute for Developmental Cancer Therapeutics, West German Cancer Center, University Hospital Essen, Essen, Germany

<sup>7</sup> Division of Solid Tumor Translational Oncology, German Cancer Consortium (DKTK, partner site Essen) and German Cancer Research Center, DKFZ, Heidelberg, Germany;

<sup>8</sup> German Cancer Consortium (DKTK), Partner site Essen, Germany

## **Supplementary Figures**

# Supplementary Figure 1

**A**

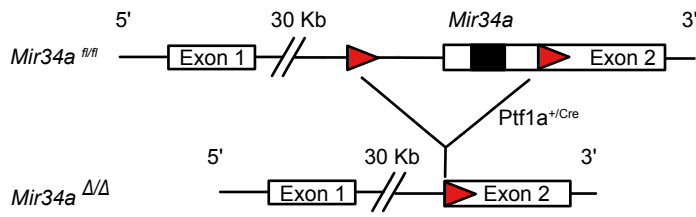

**B**

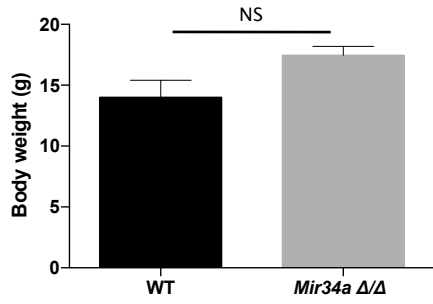

**C**

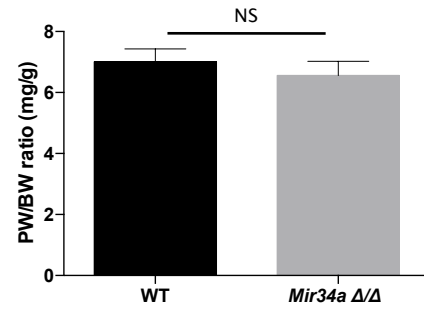

**D**

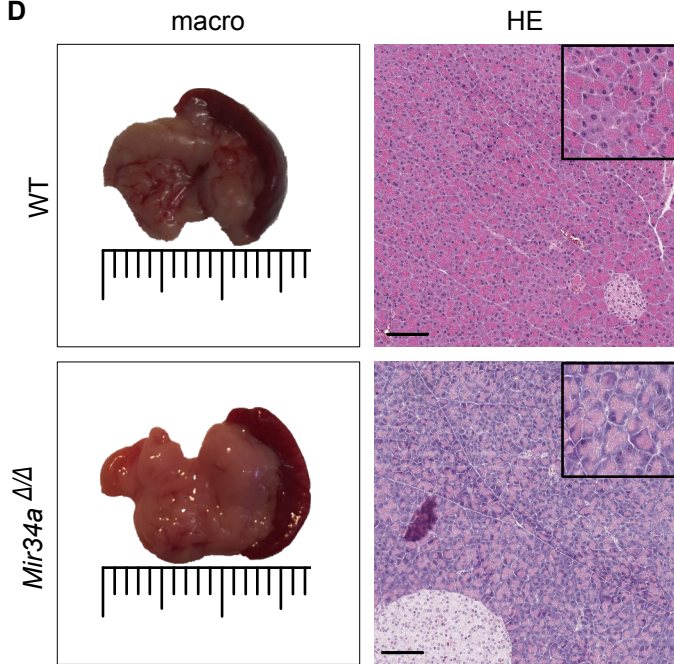

**E**

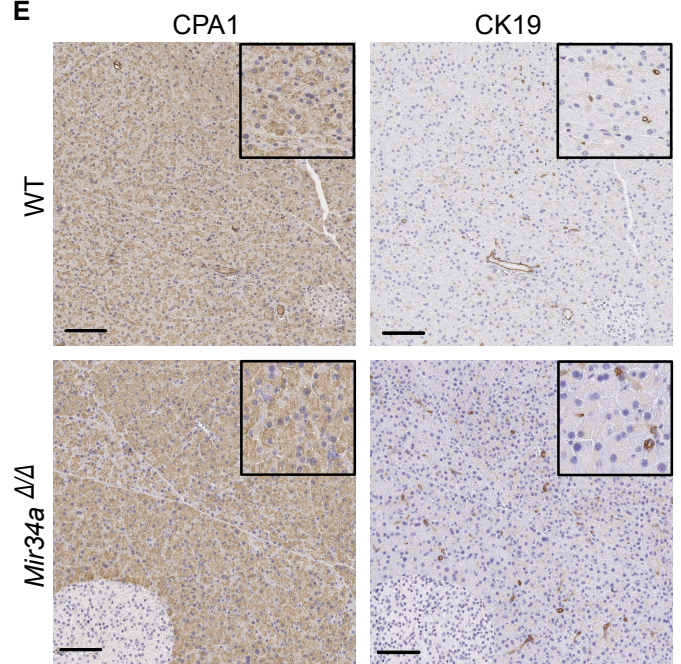

**F**

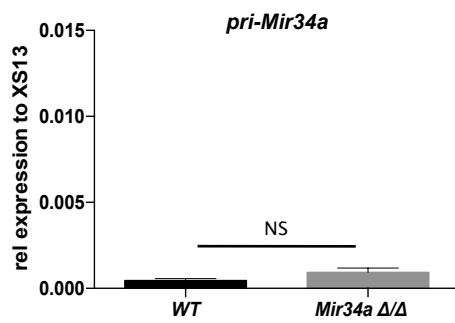

**G**

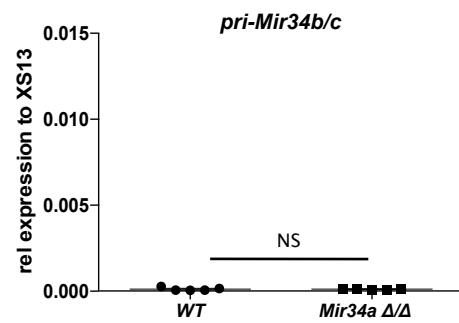

Supplementary Figure 2

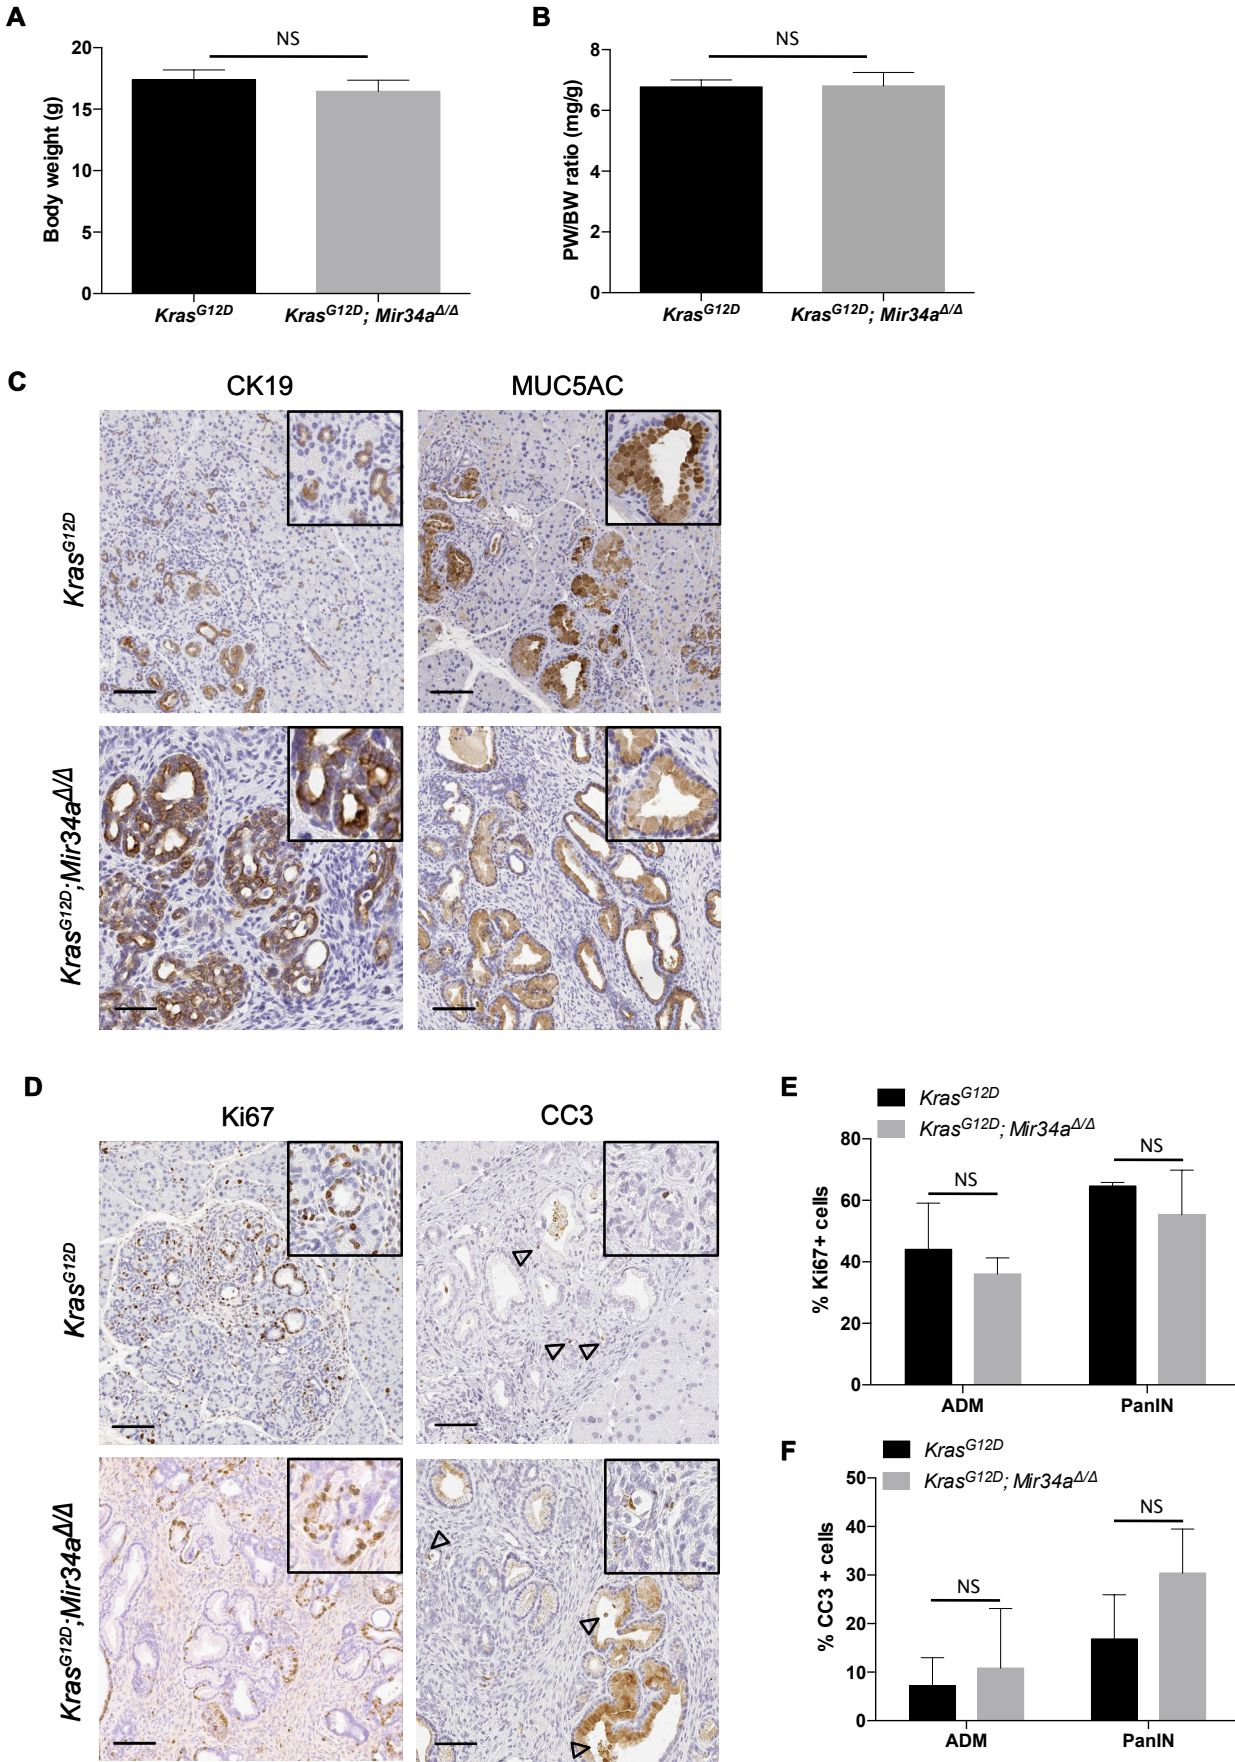

### Supplementary Figure 3

**A**

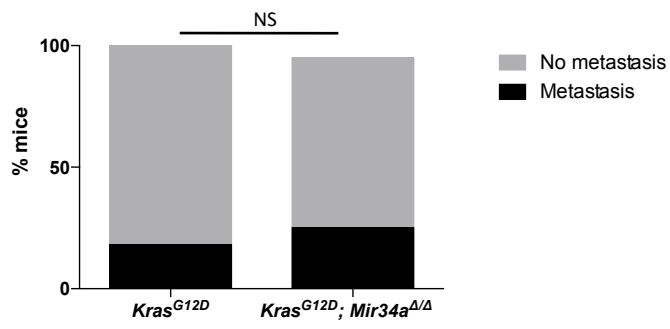

**B**

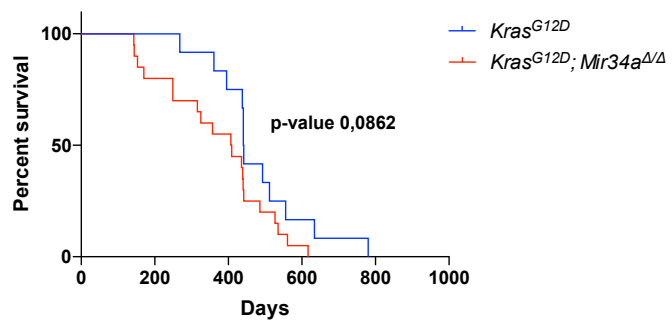

Supplementary Figure 4

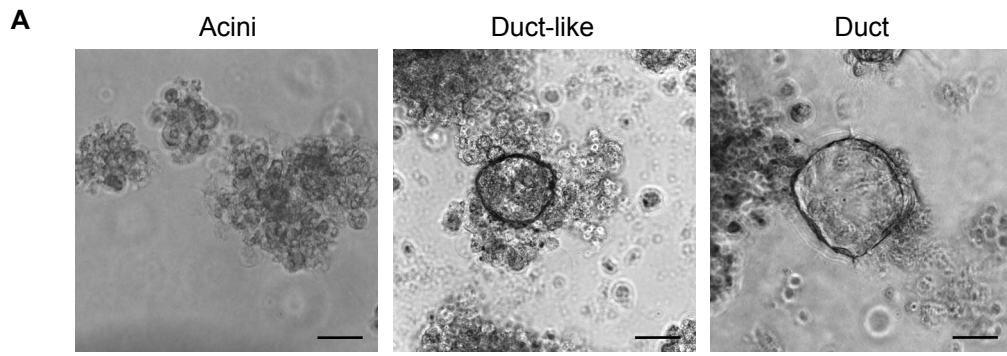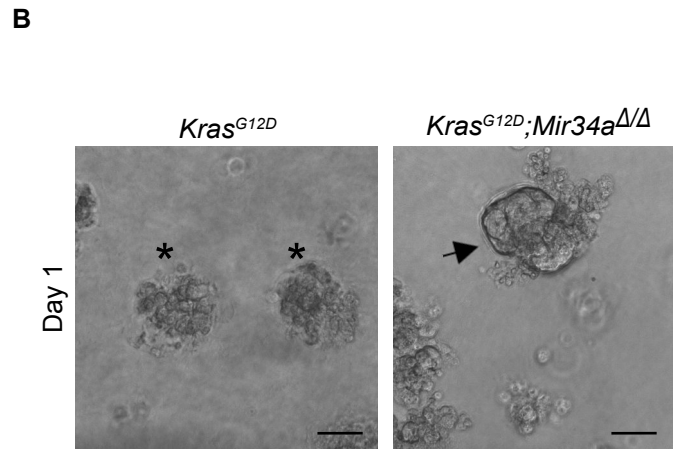

**Supplementary Table 1. NES and FDR values for GSEA.**

| Pathways                                   | Cell type | NES   | FDR         |
|--------------------------------------------|-----------|-------|-------------|
| HALLMARK_TNFA_SIGNALING_VIA_NFKB           | Acini     | 1,80  | 0,02        |
|                                            | Ductal    | 0,0   | 0,0         |
|                                            | PDAC      | 1,96  | 0,002       |
| HALLMARK_INFLAMMATORY_RESPONSE             | Acini     | 1,69  | 0,02        |
|                                            | Ductal    | 0,0   | 9.986991E-4 |
|                                            | PDAC      | 1,92  | 0,001       |
| HALLMARK_KRAS_SIGNALING_UP                 | Acini     | 1,25  | 0,15        |
|                                            | Ductal    | 0,0   | 0,003       |
|                                            | PDAC      | 1,53  | 0,03        |
| HALLMARK_EPITHELIAL_MESENCHYMAL_TRANSITION | Acini     | 1,41  | 0,08        |
|                                            | Ductal    | 0,001 | 0,01        |
|                                            | PDAC      | 1,08  | 0,42        |
| HALLMARK_TGF_BETA_SIGNALING                | Acini     | -1,02 | 0,86        |
|                                            | Ductal    | 0,02  | 0,02        |
|                                            | PDAC      | 1,43  | 0,06        |
| HALLMARK_IL6_JAK_STAT3_SIGNALING           | Acini     | 1,38  | 0,09        |
|                                            | Ductal    | 0,04  | 0,04        |
|                                            | PDAC      | 1,60  | 0,02        |
